# Supplementary material for: Modeling Root-Knot Nematode Regulation by the Biocontrol Fungus Pochonia chlamydosporia
Source: PubMed Central journal article supplement (PMC10512345; doi:10.3389/ffunb.2022.900974), 2022-07-26

**Supplementary Figure 1.** A screenshot of the Mathcad GPNR model file, showing the iterative calculations, initial variable settings, the constants, the system of equations and the iterative graphic data displays. For variables and constants descriptions see Figure 1 and Table 1.

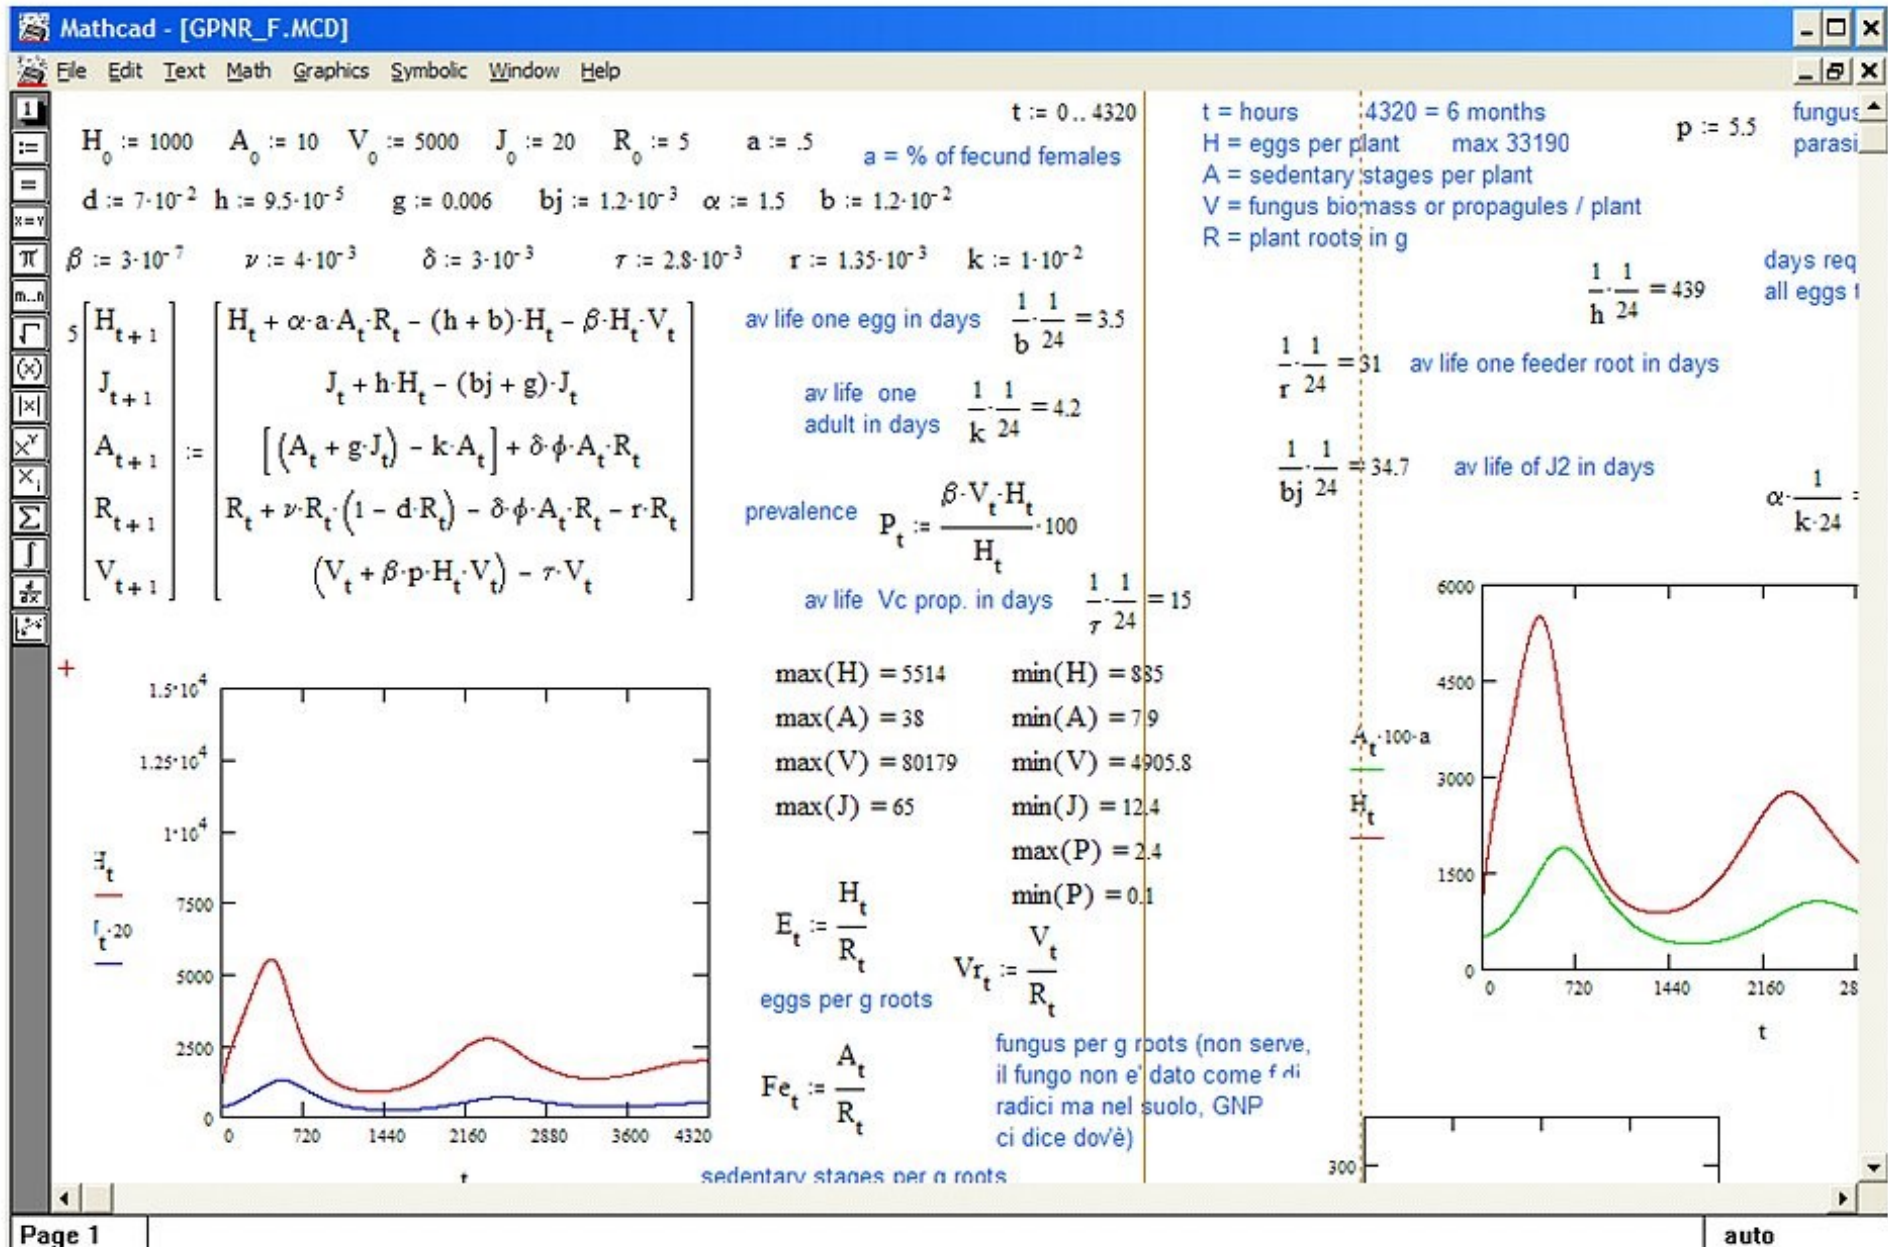

Supplement: Image_1.pdf [file Image_1.pdf]
